# Supplementary material
Source: PubMed Central journal article supplement (PMC5314867)
Supplement: NIHMS834887-supplement-SI.pdf [file NIHMS834887-supplement-SI.pdf]

# Allosteric Effects of Gold Nanoparticle on Human Serum Albumin

Qing Shao and Carol K. Hall

Department of Chemical and Biomolecular Engineering, North Carolina State University  
Raleigh NC, 27695 United States

**Table S1.** Force field parameters for protein-nanoparticle sphere-sphere interactions. The parameter  $r$  is the distance between C $\alpha$  atom (Gly and Pro)/sidechain center of mass (other protein beads) and the center of mass of the nanoparticle. The interaction energy unit: kJ/ml

| r (nm) | Gly     | Ala     | Val     | Pro     | Thr    | Ser    | Asn     | Asp     | Arg     | Lys    |
|--------|---------|---------|---------|---------|--------|--------|---------|---------|---------|--------|
| 2.08   | -4.737  | 5.247   | 34.503  | 39.546  | 34.861 | 14.108 | 10.754  | -6.645  | -28.727 | 31.962 |
| 2.09   | -13.281 | -0.305  | 29.904  | 30.22   | 33.022 | 9.46   | 8.097   | -10.117 | -32.651 | 31.701 |
| 2.1    | -21.387 | -4.673  | 24.407  | 20.135  | 30.785 | 5.205  | 5.128   | -12.682 | -35.533 | 30.896 |
| 2.11   | -28.895 | -7.779  | 18.234  | 9.675   | 28.213 | 1.468  | 1.973   | -14.362 | -37.436 | 29.35  |
| 2.12   | -35.75  | -9.628  | 11.709  | -0.701  | 25.405 | -1.646 | -1.224  | -15.243 | -38.503 | 26.952 |
| 2.13   | -41.987 | -10.294 | 5.217   | -10.518 | 22.45  | -4.064 | -4.336  | -15.466 | -38.87  | 23.69  |
| 2.14   | -47.693 | -9.922  | -0.841  | -19.34  | 19.439 | -5.749 | -7.245  | -15.194 | -38.679 | 19.696 |
| 2.15   | -52.951 | -8.725  | -6.126  | -26.829 | 16.441 | -6.711 | -9.874  | -14.602 | -38.038 | 15.214 |
| 2.16   | -57.81  | -6.972  | -10.382 | -32.796 | 13.532 | -6.991 | -12.168 | -13.843 | -37.027 | 10.591 |
| 2.17   | -62.242 | -4.959  | -13.494 | -37.221 | 10.777 | -6.69  | -14.098 | -13.054 | -35.732 | 6.213  |
| 2.18   | -66.156 | -2.97   | -15.466 | -40.248 | 8.23   | -5.938 | -15.661 | -12.332 | -34.225 | 2.435  |
| 2.19   | -69.407 | -1.245  | -16.417 | -42.154 | 5.967  | -4.9   | -16.859 | -11.746 | -32.593 | -0.486 |
| 2.2    | -71.844 | 0.06    | -16.533 | -43.279 | 4.038  | -3.744 | -17.696 | -11.318 | -30.942 | -2.436 |
| 2.21   | -73.351 | 0.885   | -16.04  | -43.971 | 2.49   | -2.632 | -18.176 | -11.056 | -29.346 | -3.462 |
| 2.22   | -73.885 | 1.266   | -15.157 | -44.497 | 1.342  | -1.702 | -18.3   | -10.921 | -27.873 | -3.754 |
| 2.23   | -73.49  | 1.318   | -14.051 | -45.024 | 0.583  | -1.034 | -18.066 | -10.866 | -26.536 | -3.578 |
| 2.24   | -72.295 | 1.193   | -12.841 | -45.59  | 0.164  | -0.669 | -17.485 | -10.821 | -25.306 | -3.236 |
| 2.25   | -70.49  | 1.04    | -11.59  | -46.128 | 0.021  | -0.572 | -16.581 | -10.718 | -24.129 | -2.985 |
| 2.26   | -68.292 | 0.959   | -10.318 | -46.502 | 0.076  | -0.684 | -15.394 | -10.514 | -22.949 | -2.997 |
| 2.27   | -65.898 | 1       | -9.017  | -46.551 | 0.252  | -0.908 | -13.992 | -10.167 | -21.672 | -3.333 |
| 2.28   | -63.469 | 1.171   | -7.672  | -46.142 | 0.49   | -1.146 | -12.458 | -9.653  | -20.259 | -3.961 |
| 2.29   | -61.101 | 1.423   | -6.272  | -45.2   | 0.75   | -1.312 | -10.896 | -8.979  | -18.694 | -4.774 |
| 2.3    | -58.82  | 1.679   | -4.822  | -43.731 | 1.014  | -1.326 | -9.391  | -8.168  | -16.952 | -5.638 |
| 2.31   | -56.599 | 1.866   | -3.354  | -41.82  | 1.266  | -1.156 | -8.018  | -7.272  | -15.06  | -6.402 |
| 2.32   | -54.381 | 1.916   | -1.902  | -39.579 | 1.507  | -0.829 | -6.838  | -6.347  | -13.087 | -6.955 |
| 2.33   | -52.103 | 1.817   | -0.508  | -37.151 | 1.738  | -0.393 | -5.872  | -5.449  | -11.104 | -7.233 |
| 2.34   | -49.715 | 1.586   | 0.787   | -34.689 | 1.964  | 0.075  | -5.115  | -4.611  | -9.202  | -7.223 |
| 2.35   | -47.192 | 1.287   | 1.946   | -32.304 | 2.185  | 0.49   | -4.531  | -3.865  | -7.491  | -6.946 |
| 2.36   | -44.551 | 0.982   | 2.941   | -30.067 | 2.403  | 0.793  | -4.086  | -3.235  | -6.048  | -6.462 |
| 2.37   | -41.843 | 0.737   | 3.769   | -28.01  | 2.622  | 0.943  | -3.728  | -2.72   | -4.9    | -5.848 |
| 2.38   | -39.137 | 0.586   | 4.427   | -26.121 | 2.83   | 0.931  | -3.409  | -2.292  | -4.057  | -5.171 |

|      |         |       |       |         |       |        |        |        |        |        |
|------|---------|-------|-------|---------|-------|--------|--------|--------|--------|--------|
| 2.39 | -36.494 | 0.536 | 4.922 | -24.358 | 3.03  | 0.771  | -3.103 | -1.922 | -3.494 | -4.507 |
| 2.4  | -33.984 | 0.57  | 5.26  | -22.671 | 3.209 | 0.514  | -2.783 | -1.585 | -3.156 | -3.897 |
| 2.41 | -31.68  | 0.647 | 5.454 | -21.021 | 3.349 | 0.211  | -2.437 | -1.274 | -2.975 | -3.383 |
| 2.42 | -29.622 | 0.718 | 5.519 | -19.391 | 3.432 | -0.071 | -2.072 | -0.97  | -2.882 | -2.978 |
| 2.43 | -27.824 | 0.749 | 5.466 | -17.779 | 3.436 | -0.292 | -1.706 | -0.678 | -2.819 | -2.691 |
| 2.44 | -26.278 | 0.729 | 5.315 | -16.232 | 3.345 | -0.423 | -1.357 | -0.409 | -2.755 | -2.522 |
| 2.45 | -24.949 | 0.65  | 5.082 | -14.781 | 3.157 | -0.462 | -1.052 | -0.17  | -2.66  | -2.454 |
| 2.46 | -23.784 | 0.53  | 4.785 | -13.471 | 2.881 | -0.427 | -0.816 | 0.022  | -2.534 | -2.46  |
| 2.47 | -22.72  | 0.398 | 4.438 | -12.329 | 2.545 | -0.351 | -0.657 | 0.164  | -2.377 | -2.527 |
| 2.48 | -21.712 | 0.269 | 4.061 | -11.38  | 2.183 | -0.265 | -0.585 | 0.251  | -2.205 | -2.62  |
| 2.49 | -20.706 | 0.171 | 3.662 | -10.631 | 1.831 | -0.202 | -0.599 | 0.297  | -2.016 | -2.719 |
| 2.5  | -19.686 | 0.113 | 3.26  | -10.071 | 1.525 | -0.186 | -0.672 | 0.307  | -1.831 | -2.808 |
| 2.51 | -18.633 | 0.1   | 2.871 | -9.662  | 1.284 | -0.215 | -0.782 | 0.297  | -1.655 | -2.869 |
| 2.52 | -17.559 | 0.13  | 2.51  | -9.359  | 1.115 | -0.271 | -0.886 | 0.261  | -1.498 | -2.89  |
| 2.53 | -16.463 | 0.197 | 2.186 | -9.115  | 1.008 | -0.334 | -0.958 | 0.222  | -1.369 | -2.866 |
| 2.54 | -15.372 | 0.289 | 1.909 | -8.891  | 0.944 | -0.372 | -0.977 | 0.183  | -1.276 | -2.787 |
| 2.55 | -14.286 | 0.389 | 1.691 | -8.651  | 0.908 | -0.368 | -0.937 | 0.151  | -1.229 | -2.666 |
| 2.56 | -13.231 | 0.49  | 1.528 | -8.375  | 0.877 | -0.31  | -0.844 | 0.142  | -1.226 | -2.499 |
| 2.57 | -12.213 | 0.579 | 1.414 | -8.057  | 0.85  | -0.211 | -0.722 | 0.162  | -1.261 | -2.312 |
| 2.58 | -11.245 | 0.658 | 1.348 | -7.703  | 0.825 | -0.078 | -0.594 | 0.225  | -1.323 | -2.118 |
| 2.59 | -10.34  | 0.719 | 1.317 | -7.345  | 0.808 | 0.067  | -0.485 | 0.331  | -1.397 | -1.929 |
| 2.6  | -9.514  | 0.77  | 1.323 | -6.99   | 0.806 | 0.195  | -0.401 | 0.479  | -1.469 | -1.757 |
| 2.61 | -8.776  | 0.812 | 1.348 | -6.663  | 0.819 | 0.302  | -0.345 | 0.655  | -1.528 | -1.604 |
| 2.62 | -8.125  | 0.851 | 1.39  | -6.373  | 0.857 | 0.37   | -0.309 | 0.842  | -1.568 | -1.468 |
| 2.63 | -7.553  | 0.886 | 1.441 | -6.124  | 0.908 | 0.411  | -0.279 | 1.021  | -1.593 | -1.343 |
| 2.64 | -7.054  | 0.922 | 1.498 | -5.918  | 0.966 | 0.428  | -0.239 | 1.168  | -1.603 | -1.221 |
| 2.65 | -6.595  | 0.951 | 1.56  | -5.739  | 1.02  | 0.43   | -0.186 | 1.272  | -1.608 | -1.096 |
| 2.66 | -6.158  | 0.971 | 1.62  | -5.576  | 1.062 | 0.431  | -0.117 | 1.334  | -1.605 | -0.97  |
| 2.67 | -5.721  | 0.968 | 1.687 | -5.409  | 1.09  | 0.428  | -0.03  | 1.355  | -1.596 | -0.847 |
| 2.68 | -5.266  | 0.938 | 1.751 | -5.231  | 1.1   | 0.425  | 0.063  | 1.35   | -1.577 | -0.737 |
| 2.69 | -4.802  | 0.878 | 1.814 | -5.039  | 1.088 | 0.418  | 0.156  | 1.336  | -1.538 | -0.645 |

**Table S2** Force field parameters for protein-nanoparticle sphere-sphere interactions. Please refer to caption of Table S1 for definition.

| r(nm) | Glu     | Gln     | Leu    | Ile     | Phe     | Tyr     | Trp     | Met     | Cys     | His     |
|-------|---------|---------|--------|---------|---------|---------|---------|---------|---------|---------|
| 2.08  | 22.974  | 11.221  | 19.437 | 34.945  | 11.183  | 13.105  | 20.447  | 31.855  | 10.349  | 20.064  |
| 2.09  | 19.757  | 6.825   | 14.66  | 33.49   | 7.415   | 8.345   | 14.803  | 28.867  | 3.125   | 15.879  |
| 2.1   | 15.998  | 2.73    | 10.127 | 31.336  | 3.07    | 3.064   | 8.637   | 24.557  | -3.309  | 10.799  |
| 2.11  | 11.981  | -0.918  | 6.022  | 28.413  | -1.637  | -2.332  | 2.244   | 19.053  | -8.614  | 4.971   |
| 2.12  | 7.978   | -4.077  | 2.456  | 24.723  | -6.423  | -7.441  | -4.073  | 12.677  | -12.642 | -1.347  |
| 2.13  | 4.244   | -6.808  | -0.556 | 20.327  | -10.955 | -11.927 | -10.064 | 5.88    | -15.407 | -7.78   |
| 2.14  | 0.94    | -9.222  | -3.059 | 15.392  | -14.924 | -15.595 | -15.566 | -0.822  | -17.085 | -13.93  |
| 2.15  | -1.867  | -11.457 | -5.116 | 10.158  | -18.09  | -18.392 | -20.511 | -6.925  | -17.936 | -19.411 |
| 2.16  | -4.193  | -13.595 | -6.777 | 4.931   | -20.32  | -20.4   | -24.89  | -12.028 | -18.233 | -23.939 |
| 2.17  | -6.112  | -15.67  | -8.05  | 0.032   | -21.599 | -21.792 | -28.74  | -15.895 | -18.215 | -27.354 |
| 2.18  | -7.728  | -17.622 | -8.917 | -4.229  | -22.028 | -22.787 | -32.094 | -18.472 | -18.018 | -29.657 |
| 2.19  | -9.133  | -19.337 | -9.316 | -7.603  | -21.782 | -23.561 | -34.958 | -19.873 | -17.687 | -30.99  |
| 2.2   | -10.397 | -20.679 | -9.214 | -9.949  | -21.075 | -24.241 | -37.29  | -20.324 | -17.199 | -31.584 |
| 2.21  | -11.56  | -21.534 | -8.619 | -11.246 | -20.102 | -24.862 | -39.023 | -20.104 | -16.506 | -31.701 |
| 2.22  | -12.62  | -21.831 | -7.599 | -11.594 | -19.019 | -25.414 | -40.084 | -19.48  | -15.563 | -31.575 |
| 2.23  | -13.562 | -21.59  | -6.271 | -11.2   | -17.918 | -25.835 | -40.436 | -18.659 | -14.376 | -31.372 |

|      |         |         |        |         |         |         |         |         |         |         |
|------|---------|---------|--------|---------|---------|---------|---------|---------|---------|---------|
| 2.24 | -14.351 | -20.883 | -4.797 | -10.308 | -16.829 | -26.06  | -40.089 | -17.766 | -12.996 | -31.16  |
| 2.25 | -14.954 | -19.834 | -3.347 | -9.18   | -15.739 | -26.044 | -39.121 | -16.847 | -11.522 | -30.915 |
| 2.26 | -15.348 | -18.579 | -2.068 | -8.032  | -14.614 | -25.767 | -37.658 | -15.902 | -10.065 | -30.555 |
| 2.27 | -15.52  | -17.24  | -1.044 | -7.013  | -13.425 | -25.24  | -35.858 | -14.9   | -8.713  | -29.98  |
| 2.28 | -15.478 | -15.907 | -0.302 | -6.192  | -12.165 | -24.492 | -33.875 | -13.826 | -7.537  | -29.1   |
| 2.29 | -15.234 | -14.643 | 0.181  | -5.552  | -10.846 | -23.554 | -31.84  | -12.674 | -6.553  | -27.877 |
| 2.3  | -14.816 | -13.431 | 0.471  | -5.038  | -9.509  | -22.453 | -29.852 | -11.476 | -5.75   | -26.325 |
| 2.31 | -14.284 | -12.254 | 0.662  | -4.571  | -8.196  | -21.218 | -27.954 | -10.268 | -5.075  | -24.511 |
| 2.32 | -13.683 | -11.083 | 0.834  | -4.088  | -6.952  | -19.879 | -26.172 | -9.083  | -4.468  | -22.527 |
| 2.33 | -13.031 | -9.906  | 1.058  | -3.541  | -5.812  | -18.471 | -24.491 | -7.952  | -3.883  | -20.495 |
| 2.34 | -12.344 | -8.716  | 1.368  | -2.926  | -4.781  | -17.02  | -22.903 | -6.897  | -3.3    | -18.519 |
| 2.35 | -11.629 | -7.54   | 1.762  | -2.268  | -3.847  | -15.567 | -21.386 | -5.908  | -2.718  | -16.667 |
| 2.36 | -10.895 | -6.413  | 2.205  | -1.607  | -2.986  | -14.168 | -19.939 | -4.973  | -2.158  | -15.001 |
| 2.37 | -10.146 | -5.383  | 2.644  | -0.988  | -2.174  | -12.882 | -18.559 | -4.068  | -1.656  | -13.533 |
| 2.38 | -9.391  | -4.502  | 3.037  | -0.446  | -1.381  | -11.753 | -17.238 | -3.19   | -1.238  | -12.255 |
| 2.39 | -8.662  | -3.771  | 3.309  | -0.016  | -0.596  | -10.794 | -15.972 | -2.36   | -0.93   | -11.144 |
| 2.4  | -7.965  | -3.2    | 3.431  | 0.285   | 0.182   | -10.012 | -14.758 | -1.611  | -0.729  | -10.157 |
| 2.41 | -7.322  | -2.763  | 3.366  | 0.476   | 0.926   | -9.377  | -13.584 | -0.983  | -0.63   | -9.262  |
| 2.42 | -6.731  | -2.41   | 3.12   | 0.572   | 1.608   | -8.842  | -12.441 | -0.516  | -0.607  | -8.416  |
| 2.43 | -6.19   | -2.094  | 2.73   | 0.606   | 2.2     | -8.358  | -11.324 | -0.244  | -0.649  | -7.597  |
| 2.44 | -5.691  | -1.783  | 2.252  | 0.599   | 2.666   | -7.904  | -10.224 | -0.169  | -0.716  | -6.783  |
| 2.45 | -5.221  | -1.462  | 1.744  | 0.572   | 2.974   | -7.452  | -9.149  | -0.286  | -0.788  | -5.974  |
| 2.46 | -4.77   | -1.127  | 1.264  | 0.542   | 3.108   | -6.992  | -8.105  | -0.554  | -0.853  | -5.182  |
| 2.47 | -4.344  | -0.794  | 0.867  | 0.506   | 3.062   | -6.53   | -7.121  | -0.919  | -0.898  | -4.441  |
| 2.48 | -3.942  | -0.494  | 0.57   | 0.454   | 2.86    | -6.072  | -6.215  | -1.317  | -0.928  | -3.77   |
| 2.49 | -3.578  | -0.252  | 0.382  | 0.381   | 2.54    | -5.635  | -5.403  | -1.683  | -0.938  | -3.2    |
| 2.5  | -3.26   | -0.084  | 0.282  | 0.28    | 2.154   | -5.223  | -4.703  | -1.972  | -0.939  | -2.758  |
| 2.51 | -3.004  | 0.01    | 0.249  | 0.14    | 1.757   | -4.838  | -4.111  | -2.155  | -0.932  | -2.445  |
| 2.52 | -2.802  | 0.037   | 0.252  | -0.029  | 1.396   | -4.465  | -3.618  | -2.228  | -0.919  | -2.265  |
| 2.53 | -2.658  | 0.017   | 0.26   | -0.21   | 1.107   | -4.094  | -3.214  | -2.221  | -0.898  | -2.197  |
| 2.54 | -2.558  | -0.032  | 0.257  | -0.382  | 0.891   | -3.705  | -2.881  | -2.16   | -0.857  | -2.212  |
| 2.55 | -2.487  | -0.088  | 0.237  | -0.531  | 0.748   | -3.286  | -2.597  | -2.08   | -0.793  | -2.282  |
| 2.56 | -2.446  | -0.14   | 0.202  | -0.634  | 0.653   | -2.841  | -2.351  | -2.02   | -0.695  | -2.364  |
| 2.57 | -2.414  | -0.185  | 0.155  | -0.676  | 0.567   | -2.389  | -2.142  | -1.991  | -0.556  | -2.434  |
| 2.58 | -2.39   | -0.218  | 0.125  | -0.659  | 0.47    | -1.95   | -1.962  | -1.993  | -0.386  | -2.466  |
| 2.59 | -2.36   | -0.243  | 0.123  | -0.59   | 0.348   | -1.537  | -1.819  | -2.006  | -0.189  | -2.446  |
| 2.6  | -2.319  | -0.253  | 0.148  | -0.479  | 0.193   | -1.164  | -1.716  | -2.005  | 0.022   | -2.374  |
| 2.61 | -2.264  | -0.253  | 0.205  | -0.353  | 0.023   | -0.836  | -1.664  | -1.97   | 0.226   | -2.259  |
| 2.62 | -2.187  | -0.235  | 0.291  | -0.223  | -0.146  | -0.541  | -1.656  | -1.883  | 0.403   | -2.12   |
| 2.63 | -2.095  | -0.207  | 0.394  | -0.097  | -0.29   | -0.259  | -1.698  | -1.741  | 0.544   | -1.974  |
| 2.64 | -1.989  | -0.164  | 0.501  | 0.002   | -0.383  | 0.025   | -1.775  | -1.558  | 0.635   | -1.835  |
| 2.65 | -1.869  | -0.126  | 0.604  | 0.081   | -0.418  | 0.324   | -1.877  | -1.354  | 0.684   | -1.706  |
| 2.66 | -1.751  | -0.105  | 0.693  | 0.134   | -0.396  | 0.626   | -1.984  | -1.162  | 0.704   | -1.577  |
| 2.67 | -1.63   | -0.108  | 0.758  | 0.181   | -0.326  | 0.933   | -2.076  | -0.993  | 0.699   | -1.444  |
| 2.68 | -1.515  | -0.132  | 0.796  | 0.225   | -0.222  | 1.2     | -2.143  | -0.866  | 0.682   | -1.297  |
| 2.69 | -1.417  | -0.18   | 0.808  | 0.286   | -0.103  | 1.426   | -2.177  | -0.79   | 0.661   | -1.127  |

**Table S3.** The number of water molecules and ions in the simulation systems for the four protein-nanoparticle complexes. All systems contain an albumin protein (5873 atoms) and a 4.0 nm gold nanoparticle (1985 atoms).

| Complex | Water molecules | Na+ | Cl- | Total number of atoms |
|---------|-----------------|-----|-----|-----------------------|
| A       | 28711           | 93  | 78  | 94162                 |
| B       | 28211           | 93  | 78  | 92662                 |
| C       | 28253           | 93  | 78  | 92788                 |
| D       | 29172           | 93  | 78  | 93560                 |

**Table S4.** The IDs of amino acid residues that have  $\Delta Sec^i > 0.5$  and  $d_i > 5.0$  nm in four complexes

|   |                                                                                                                                                                                    |
|---|------------------------------------------------------------------------------------------------------------------------------------------------------------------------------------|
| A | 57,116,300,503,504,506,507,508,510,511,512,513,514,515,540,541,542,543,544,545,546,547,560,561,563,564,565,566,567,568,579                                                         |
| B | 32,33,57,61,77,78,79,84,106,109,147,248,250,297,298,300,304,305,311,312,314,511,512,513,514,515,568,569                                                                            |
| C | 300,305,306,307,314,338,451,495                                                                                                                                                    |
| D | 81,205,206,305,306,312,313,314,341,353,375,376,416,417,418,435,450,457,460,461,481,482,483,497,503,504,505,507,511,512,513,514,515,540,542,543,544,545,546,547,559,561,562,564,568 |

**Table S5** The IDs of amino acid residues in binding sites of HSA proteins<sup>1</sup>

| Binding Site                | Residues                                                       |
|-----------------------------|----------------------------------------------------------------|
| Fatty acid binding sites    |                                                                |
| FA1                         | Tyr138, Tyr161                                                 |
| FA2                         | Tyr150, Arg257, Ser287                                         |
| FA3                         | Ser342, Arg348, Arg485                                         |
| FA4                         | Arg410 Tyr411, Ser489                                          |
| FA5                         | Tyr401, Lys525                                                 |
| FA6                         | Arg209, Asp324, Ser480, Lys351, Glu354                         |
| FA7 (Suldow's site I)       | Tyr150, Lys199, Arg218, Arg222, His242, Arg257, Leu328, Ala291 |
| FA8                         | Lys195, Lys199, Arg218, Asp451, Ser454                         |
| FA9                         | Glu187, Lys432                                                 |
| Heme binding                | Arg114, His146, Lys190                                         |
| Thyroxin binding sites      |                                                                |
| Tr1                         | Tyr150, Lys199, Trp214, Arg218, Arg222, Arg257                 |
| Tr2                         | Glu390, Asn391, Leu394, Ala406, Arg410, Tyr411, Ser489         |
| Tr3/Tr4                     | Asp301, Residues 502-514, Ala528, Leu532                       |
| Bacteria protein (BacP)     | Phe228, Ala229, Asn318, Glu321, Ala322, Val325, Phe326, Met329 |
| Metal Binding sites (Metal) | Asp1, Ala2, His3, Cys34, His67, Asn99, His247, Asp249          |

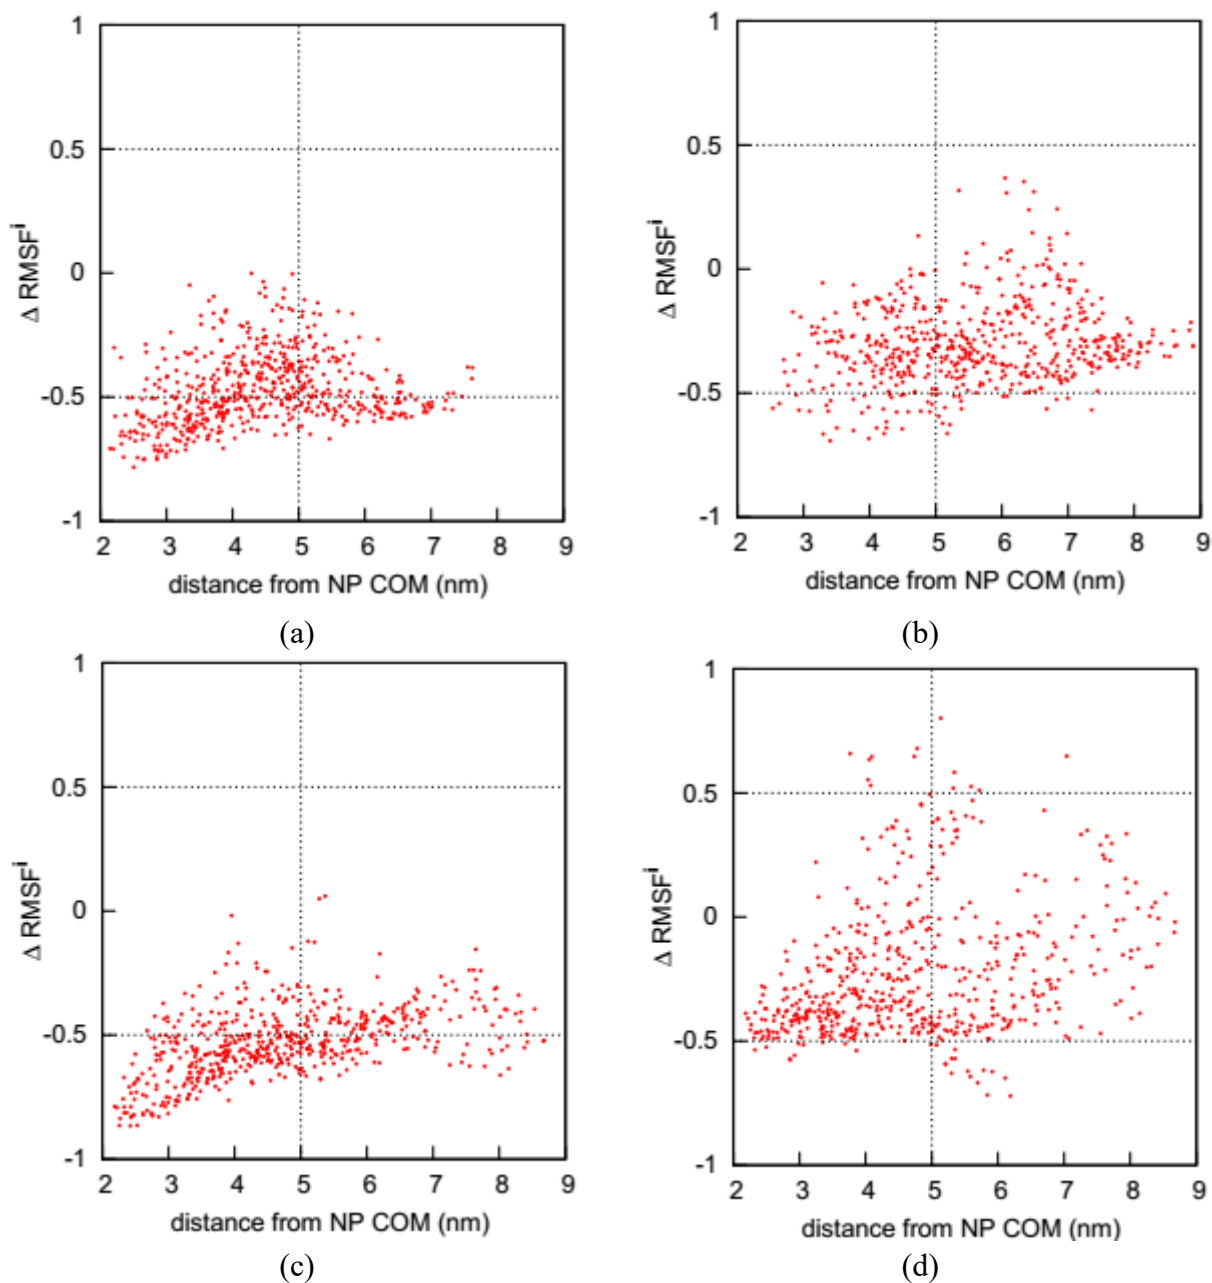

**Figure S1.**  $\Delta RMSF^i$  of  $C\alpha$  atoms on the HSA protein vs. their distance from the center of mass of the gold NP in (a) Complex A, (b) Complex B, (c) Complex C, and (d) Complex D. A negative value indicates that the residue decreases its flexibility and a positive value indicates that the residue increases its flexibility compared to its flexibility in the bulk solution.

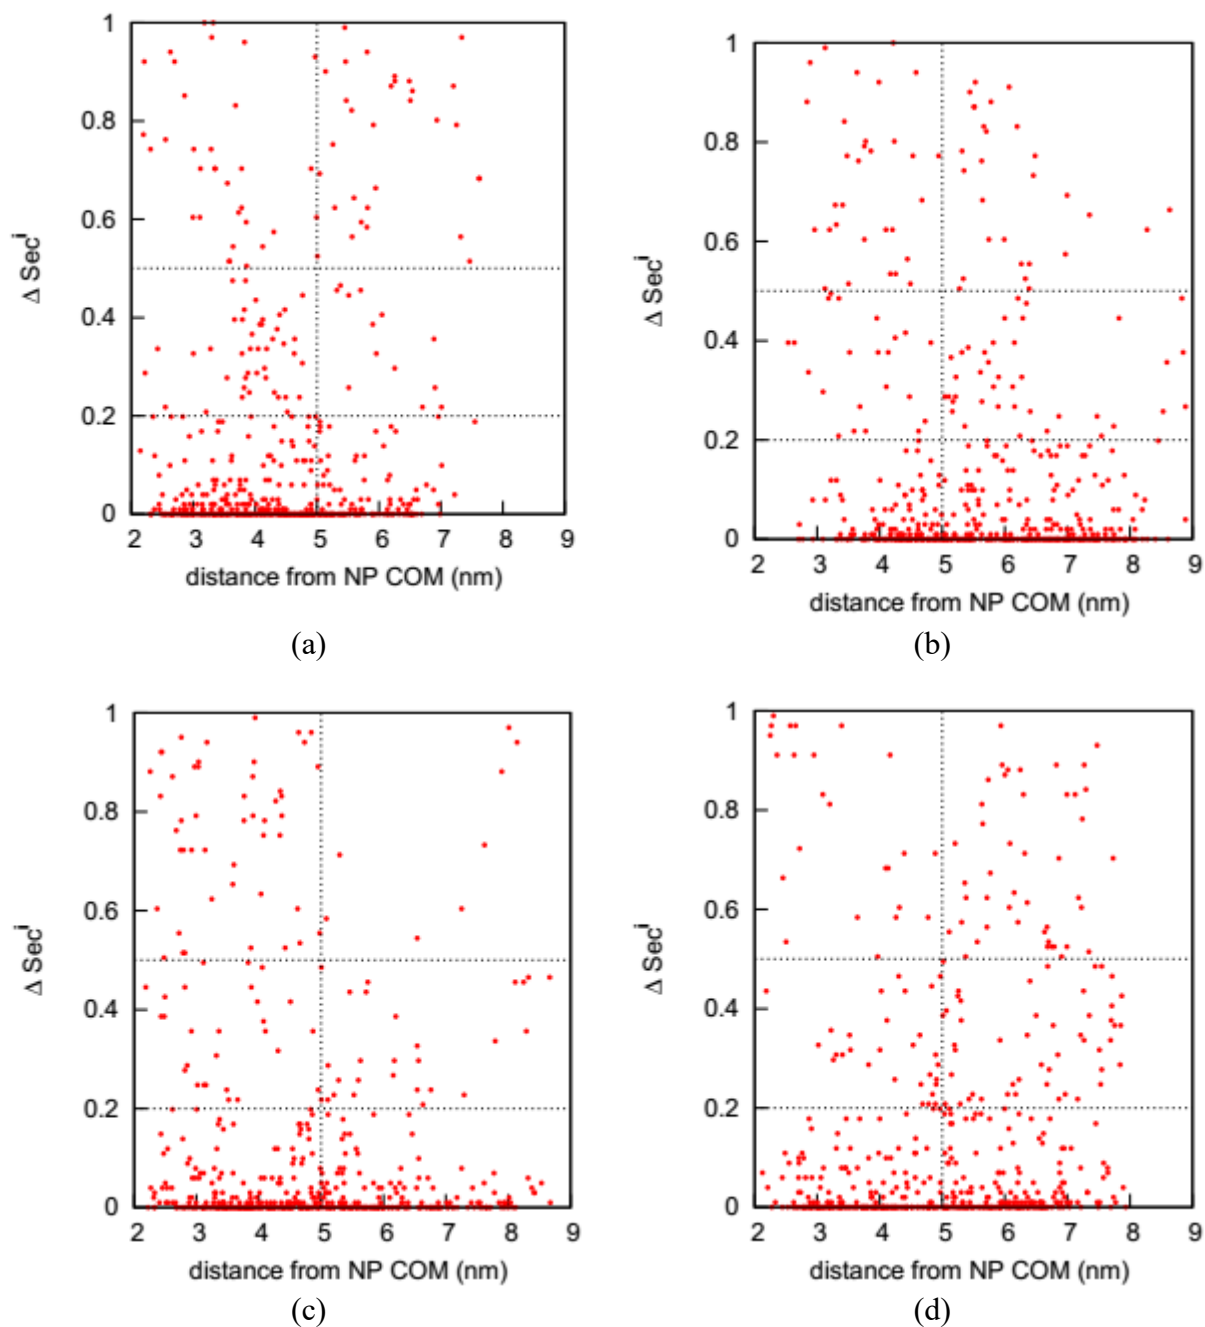

**Figure S2.**  $\Delta Sec^i$  of individual residues  $i$  vs. distance between their  $C\alpha$  atoms and the center of mass of the gold NP. (a) Complex A, (d) Complex B, (c) Complex C and (d) Complex D. Many residues have  $\Delta Sec^i > 0.5$ ; the binding of the gold NP changes the secondary structure of these residues significantly. These residues are distributed on regions close to and distant from the NP.

Reference:

<sup>1</sup>G. Fanali, A. di Masi, V. Trezza, M. Marino, M. Fasano and P. Ascenzi, *Molecular Aspects of Medicine*, 2012, **33**, 209-290.
